# Supplementary material for: 1H nuclear magnetic resonance spectroscopy metabolomics of giraffe milk during mid- to late-lactation
Source: Research Square preprint supplement (doi:10.21203/rs.3.rs-7179475/v1), 2025-07-25

Supplementary Data: 1H nuclear magnetic resonance spectroscopy metabolomics of giraffe milk during mid- to late-lactation

G. Osthoff*a, Mason, S.b, Deacon, Fc

a Department of Microbiology and Biochemistry, University of the Free State, Bloemfontein, South Africa.

b Biomedical and Molecular Metabolism Research (BioMMet), Faculty of Natural and Agricultural Sciences, North-West University, Potchefstroom, South Africa.

c Department of Animal, Wildlife and Grassland Sciences, University of the Free State, Bloemfontein, 9300, South Africa.

**Figure S1:** 1H-NMR spectrum of quality control samples with peak annotations. Boxes A-D are zoomed-in regions. Annotations: 1 = Caprylic acid; 2 = Caproic acid; 3 = Butyric acid; 4 = Other fatty acids (small- to medium-chain); 5 = Leucine; 6 = Isoleucine; 7 = Valine; 8 = Propionic acid; 9 = 3-Hydroxybutyric acid; 10 = Lactic acid; 11 = Alanine; 12 = Acetic acid; 13 = N-Acetylglucosamine; 14 = UDP-N-Acetylglucosamine; 15 = UDP-Glucose; 16 = UDP-Galactose; 17 = Acetone; 18 = Pyruvic acid; 19 = Succinic acid; 20 = 2-Oxoglutaric acid; 21 = Citric acid; 22 = Aspartic acid; 23 = Dimethylamine; 24 = Methylamine; 25 = Trimethylamine; 26 = Sarcosine; 27 = Lysine; 28 = Creatine; 29 = Creatinine; 30 = Creatine phosphate; 31 = Malonic acid; 32 = Dimethyl sulfone; 33 = Choline; 34 = Phosphocholine; 35 = Carnitine; 36 = Glycerophosphocholine; 37 = Betaine; 38 = Trimethylamine-N-oxide; 39 = myo-Inositol; 40 = Threonine; 41 = Malic acid; 42 = Galactose; 43 = Glucose; 44 = Unassigned disaccharide; 45 = Allantoin; 46 = Uracil; 47 = Uridine; 48 = Orotic acid; 49= Fumaric acid; 50 = trans-Aconitic acid; 51 = Tyrosine; 52 = Phenylalanine; 53 = Hippuric acid; 54 = Formic acid; 55 = AMP; 56 = ADP; 57 = Nicotinamide; 58 = Glutamic acid.


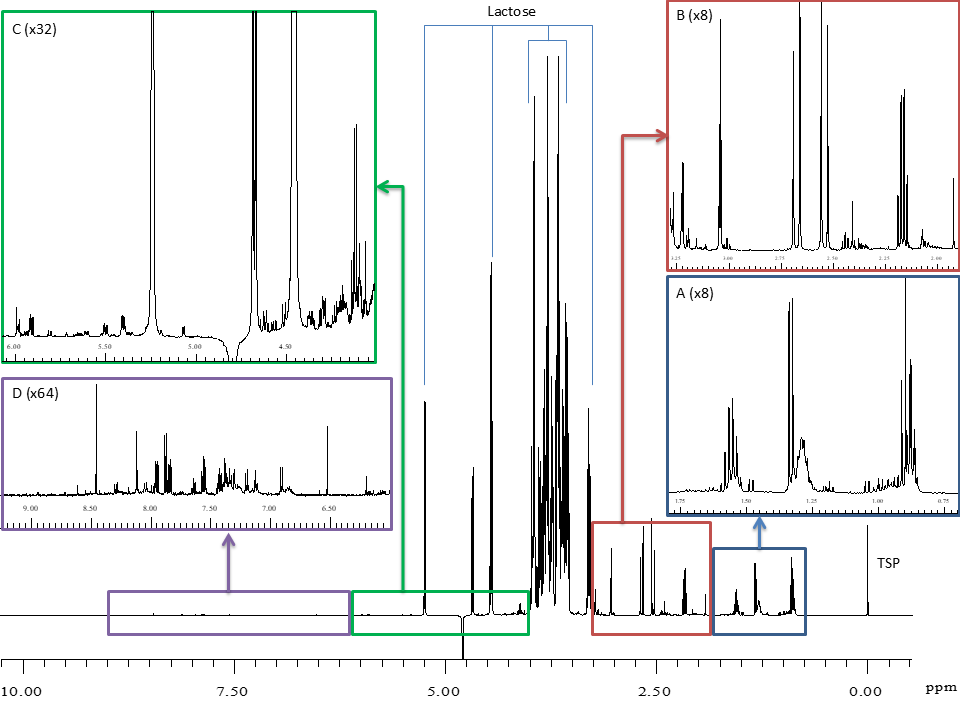


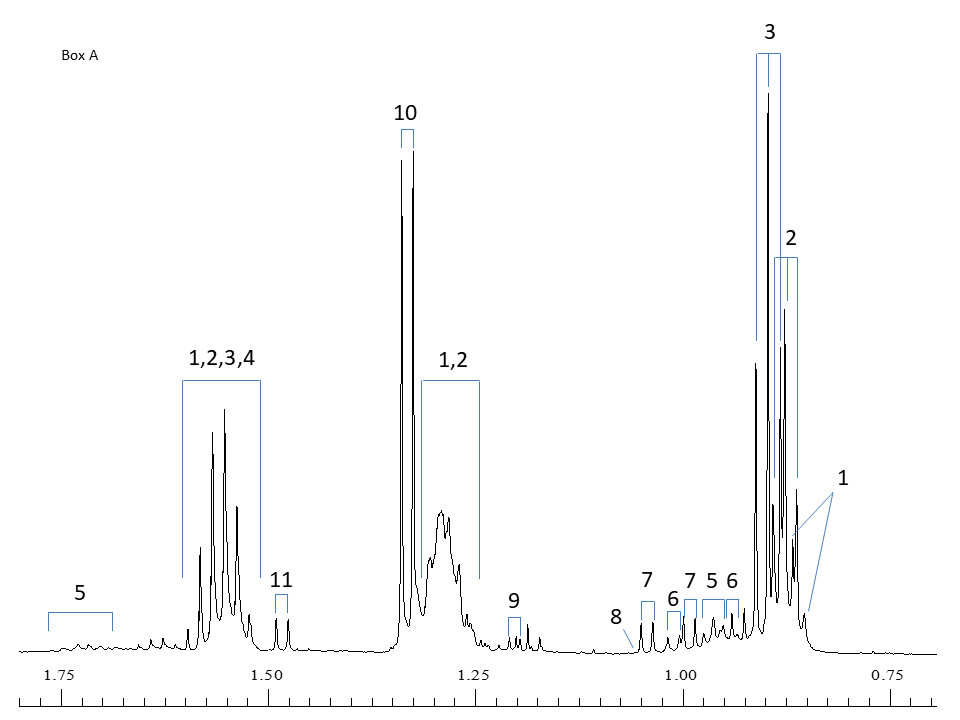


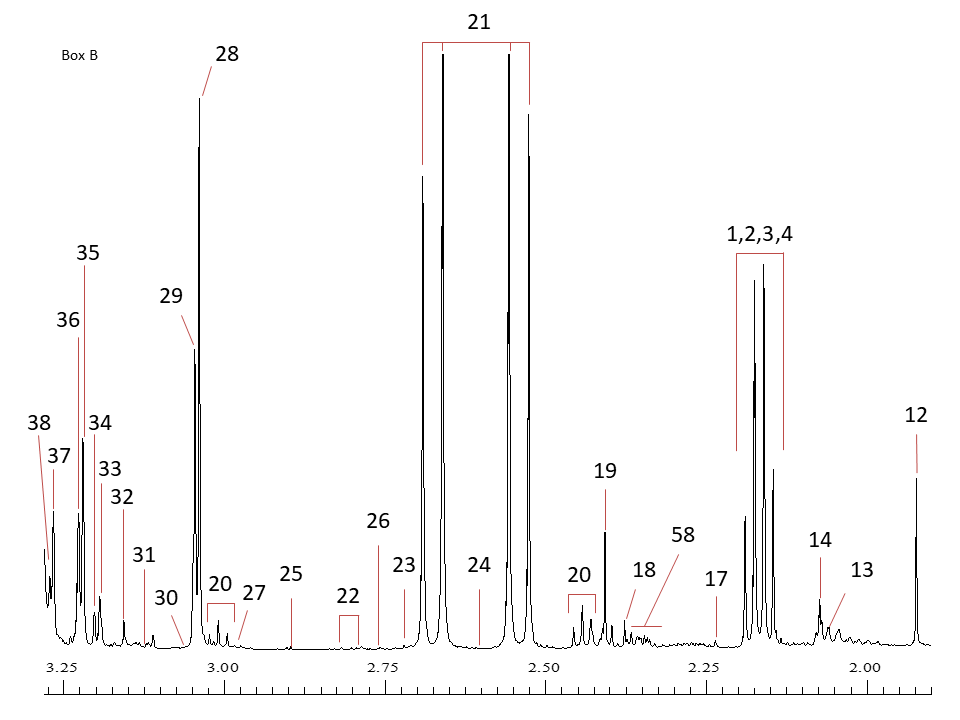


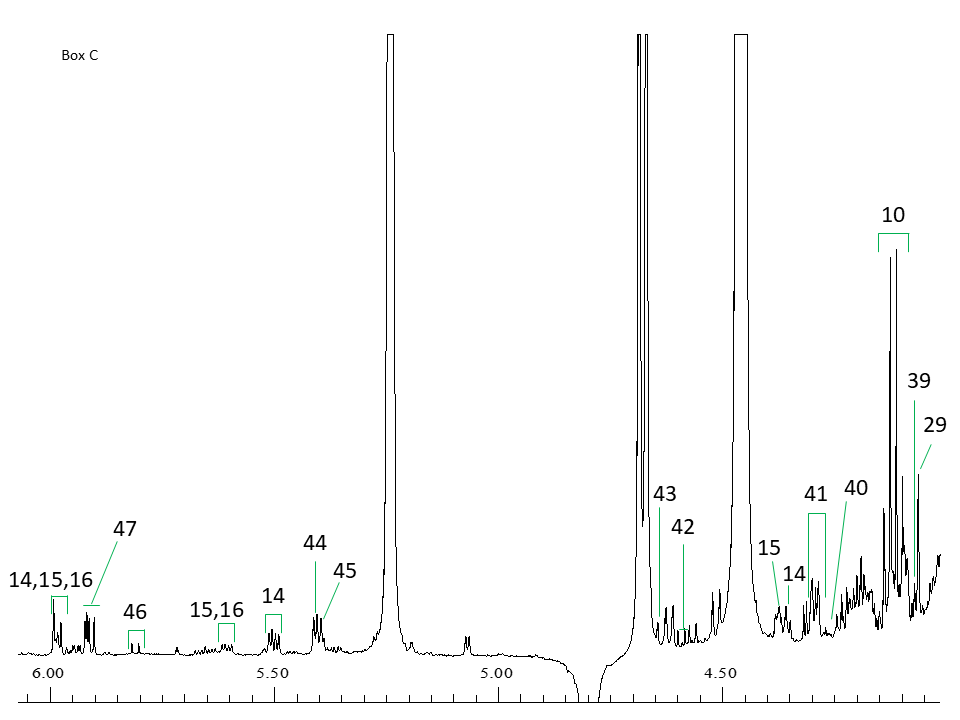


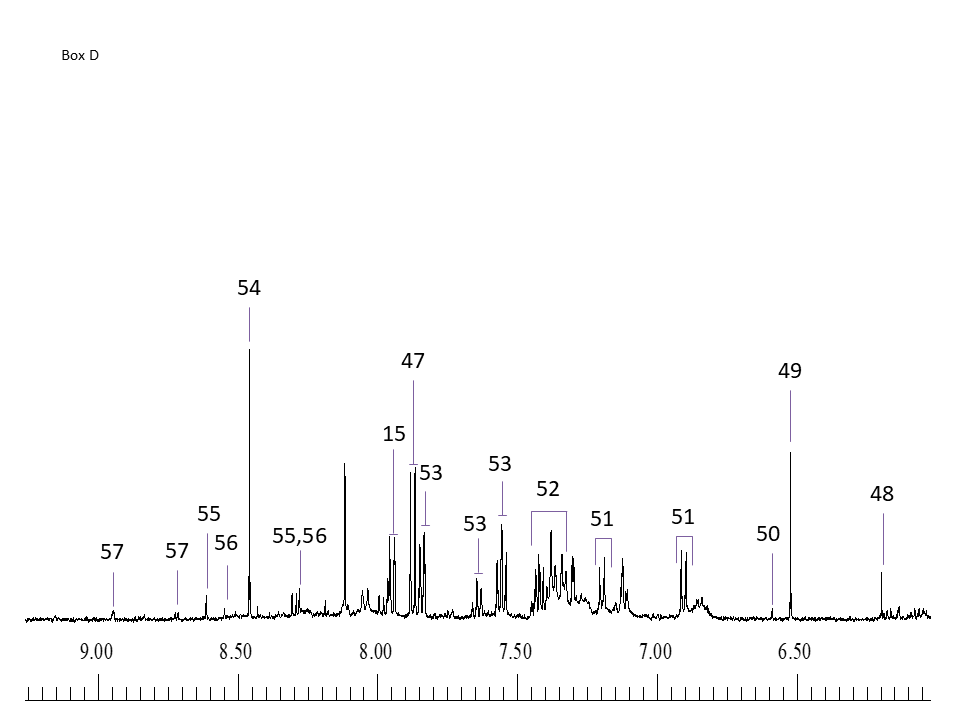

Supplement: Supplementary file 2 [file fb9209680826b445d299c7e3.docx]
