# Supplementary material for: 1H nuclear magnetic resonance spectroscopy metabolomics of giraffe milk during mid- to late-lactation
Source: Research Square preprint supplement (doi:10.21203/rs.3.rs-7179475/v1), 2025-07-25
Supplement: Supplementary file 1 [file 16d6d377db8e2b4a9bd096d4.xlsx]

## Sheet: Sheet1
	Lactation	Lactose	Glucose	Galactose	Butyric acid	Caproic acid	Capyrlic acid	Valine	Isoleucine	Leucine	3-Hydroxybutyric acid	Lactic acid	Alanine	Acetic acid	N-Acetylglucosamine	UDP-N-Acetylglucosamine	UDP-Glucose	UDP-Galactose	Unass Disacch	Allantoin	Acetone	Pyruvic acid	Succinic acid	2-Oxoglutaric acid	Citric acid	Fumaric acid	Aspartic acid	Dimethylamine	Methylamine	Trimethylamine	Sarcosine	Lysine	Creatine	Creatinine	Creatine phospahte	Malonic acid	Dimethyl sulfone	Choline	Phosphochoine	Glycerophosphocholine	Carnitine	Betaine	Trimethylamine-N-oxide	myo-Inositol	Uracil	Uridine	Orotic acid	trans-Aconitic acid	Tyrosine
Katherine 8.9	9.4	75801.7	280.42	451.77	5721.68	3499.24	593.97	170.86	201.16	459.79	59.11	1193.56	220.53	1516.08	375.73	73.62	173.71	55.08	265.77	169.28	28.26	62.32	553.6	1001.96	8759.29	3.99	169.35	70.86	15.32	5.44	21.08	661.14	2403.39	346.46	278.37	111.54	63.06	22.91	26.93	89.14	56.98	38.06	23.5	564.81	347.33	130.7	15.48	9.37	117.02
Ayanda 8.9	9.4	80071.6	249.13	421.16	6285.17	3871.73	773.53	171.55	187.04	348.64	41.06	1841.35	218.99	664.59	160.99	250.73	179.75	110.87	453.06	276.77	24.36	106.27	193.23	1027	10434.3	109.86	123.45	116.67	12.48	3.67	22.53	519.61	1965.07	396.69	287.21	159.62	59.89	27.93	26.2	149.01	47.66	42.24	24.5	705.64	243.15	358.99	23.19	13.37	90.11
Tiffany 9.2	9.4	92579.1	287.69	386.76	4556.42	3488.73	759.41	39.6	33.64	18.91	14.97	1071.55	102.62	109.59	84.92	262.57	276.8	131.12	487.17	283.72	17.33	121.71	143.26	1032.53	12774.3	105.59	85.49	18.02	9.85	3.38	14.54	409.26	1790.22	1148.26	355.1	121.28	55.66	23.6	10.5	154.57	83.76	60.95	27.14	637.49	119.61	838.74	30.72	5.35	12.07
Andri 9.2	9.4	79231	253.69	363.65	2401.84	2121.25	678.05	42.97	36.84	78.51	18.09	372.27	86	118.1	90.22	186	225.11	85.72	360.72	201.03	13.09	127.49	105.35	873.13	7261.91	35.92	49.79	9.79	7.08	2.89	11.22	370	1445.51	1058.81	308.57	62.52	58.41	27.02	24.63	86.88	53.15	62.88	23.57	485.53	320.69	23.8	25.51	4.04	23.52
Katherine 9.4	9.4	77206.8	251.69	569.15	5801.76	3561.23	514.5	170.09	115.71	254.77	24.22	1229.83	164.46	829.22	258.55	81.16	183.01	65.33	314.12	215.33	17.66	49.85	355.76	991.3	8079.67	2.5	86.36	15.89	8.03	4.52	11.71	379.12	2500.37	406.76	308.77	88.37	52.9	36.66	22.57	98.08	60.15	52.18	21.68	662.54	168.1	429.48	17.24	19.8	82.32
Ayanda 9.4	9.4	88367.7	235.73	395.32	4052.12	3165.08	763.62	55.47	57.02	107.39	25.51	1459.27	121.89	1097.92	346.49	45.31	242.34	92.3	299.79	152.75	17.17	35.67	410.27	696.65	8550.52	0.89	91.33	40.36	8.11	4.04	14.68	258.31	2007.57	434.84	296.76	175.18	74.73	25.47	32.09	103.19	56.5	60.43	25.5	751.8	403.05	31.41	26.19	91.41	30.56
Marietjie 9.4	9.4	82129.8	255.13	335.24	3614.24	2805.73	672.43	31.24	26.27	15.64	14.37	723.57	92.1	98.88	68.74	243.06	157.87	95.7	420.72	233.21	19.25	86.8	157.43	827.52	9401.8	127.16	114.62	17.58	8.82	3.7	10.07	417.02	1979.86	1035.94	337.72	129.54	41.5	18.04	10.4	86.58	42.93	27.26	21.69	455.76	122.05	355.73	37.93	4.48	10.34
Tiffany 9.4	9.4	87433.1	260.87	438.16	3638.99	2770.13	615.03	44.8	35.41	33.01	13.34	919.27	140.72	561.3	142.21	167.7	217.73	86.16	396.59	208.64	13.52	114.49	146.99	728.01	11077.5	46.17	77.61	14.44	9.04	3.58	12.33	259.1	1977.93	474.07	293.81	120.44	102.42	22.32	13.81	117.46	79.31	56.15	24.98	620.66	131.01	640.39	23.37	7.64	17.33
Andri 9.4	9.4	94208.8	278.4	404.84	1832.34	1765.45	644.29	55.25	27.25	25.29	20.09	353.31	58.5	54.58	56.63	206.33	294.29	105.73	424.84	241.25	16.8	68.65	126.73	900.55	8578.91	109.95	57.75	12.2	8.48	2.99	11.53	389.99	1521.51	1438.23	294.24	68.12	59.33	32.22	7.23	84.12	63.91	60.67	27.01	464.05	42.94	647.59	30.08	1.8	12.85
Marietjie 9.6	9.4	87747	296.2	518.67	3971.92	3175.14	702.08	164.03	262.35	575.44	63.88	1406.73	240.41	1484.44	374.3	95.47	108.59	69.78	292.42	128.06	35.44	82.65	657.17	827.82	8631.98	5.53	225.82	22.8	17.3	6.11	21.35	591.37	2745.11	459.68	351.18	224.64	67.35	24.35	28.27	95.96	51.5	44.7	23.54	730.67	217.86	38.63	29.27	38.01	128.23
Tiffany 9.6	9.4	87794.2	311.51	404.54	5038.41	3630.25	773.55	62.47	46.4	38.24	22.66	2026.55	174.45	177.83	163.38	275.53	304.54	122.28	487.53	298.46	16.85	157.08	152.31	1037.67	11997.7	93.78	86.62	15.91	8.78	3.43	15.95	418.51	1791.02	1181.28	378.82	119.26	84.65	25.32	16.1	137.2	76.76	66.49	26.77	755.7	150.04	858.56	41.16	6.27	18.77
Marietjie 11.7	12	72007.8	354	574.73	106.58	103.88	44.05	65.09	40.81	76.44	105.97	546.18	65.68	209.89	103.17	110.92	291.77	38.41	267.17	180.75	40.82	43.93	116.02	579.64	14360.2	154.77	201.63	28.7	15.19	2.41	22.53	466.47	799.6	173.61	157.33	30.17	48.56	94.5	18.95	22.22	21.88	27.96	21.24	926.31	97.53	48.57	17.23	8.55	26.55
Andri 11.7	12	79287.3	219.02	307.54	1711.92	1391.05	432.49	32.24	18	15.21	12.65	357	52.6	59.07	58.09	199.64	259.81	85.75	370.91	191.06	15.15	22.9	98.01	756.89	7276.54	75.26	71.01	12	8.39	1.98	8.95	298.64	1022.2	935.39	326.72	75.59	40.97	31.96	7.09	75.48	65.61	50.96	21.93	421.79	24.21	489.24	22.42	1.9	7.07
Katherine 12	12	99940.7	331.14	418.46	5099.69	3621.43	717.73	57.19	44.57	36.16	17.97	867.19	160.85	163.72	162.13	250.72	300.11	100.19	490.63	277.42	14.45	41.15	178.36	1316.87	9560.68	73.37	107.45	19.39	8.86	4.1	13.84	499.56	2029.81	1263.45	351.32	94.32	58.76	24.1	7.35	89.96	97.96	54.27	28.06	537.7	36.79	856.7	21.06	3.96	18.07
Marietjie 12.2	12	15586.8	701.91	1928.26	1996.09	1276.28	421.4	1338.69	821.56	1550.47	116.66	8266.32	1196.74	492.1	458.17	177.56	21.33	16.15	76.23	91.42	31.35	197.49	153.57	633.87	1326.76	60.6	831.99	23.39	15.56	3.38	55.45	496.65	484.3	95.18	158.6	107.99	90.55	14.3	88.08	8.12	7.97	27.25	18.69	925.95	163.75	134.76	16.48	1.78	556.48
Katherine 15.1	15.1	4855.1	386.96	470.11	641.58	493.94	187.39	770.31	353.57	680.25	145.47	10010	861.99	403.86	160	68.49	22.4	18.59	53.92	131.19	19.17	74.59	93.39	197.58	1110.84	34.47	307.88	15.43	9.22	1.48	38.26	208.63	319.53	65.95	123.71	65.05	98.66	6.95	22.86	7.57	5.95	49.02	12.07	310.31	75.13	198.79	2.98	0.96	289.05
Ayanda 15.1	15.1	5864.71	283.19	405.51	423.28	321.84	130.95	586.57	293.49	599.24	163.69	8422.53	954.1	484.05	152.56	69.93	21.55	16.45	62.56	140.65	17.22	86.23	84.56	238.34	1070.93	30.08	245.89	11.86	11.71	1.37	31.11	203.93	347.43	76.01	141.87	64.44	96.57	6.98	20.88	8.88	7.82	44.61	15.68	279.83	85.09	205.25	4.68	2.49	310.89
Marietjie 15.1	15.1	7179.8	599.17	1240.45	2151.85	1640.3	602.27	1331.14	746.57	1777.6	315.21	11467.8	1334.83	714.05	448.67	171.54	26.41	18.23	71.74	126.56	45.54	259.17	175.09	676.53	1569.59	64.46	883.27	34.94	24.94	3.71	71.86	727	331.82	78.18	184.79	145.41	111.93	14.95	33.47	9.57	9.6	32.82	17.03	658.75	89.57	345.02	8.76	2.92	631.47
[truncated: 11 more columns]
